# Supplementary material
Source: publisher figshare collection journal article supplement (https://gsajournals.figshare.com/ndownloader/files/18219152)
Supplement: Supplementary file 1 [file 18219152]

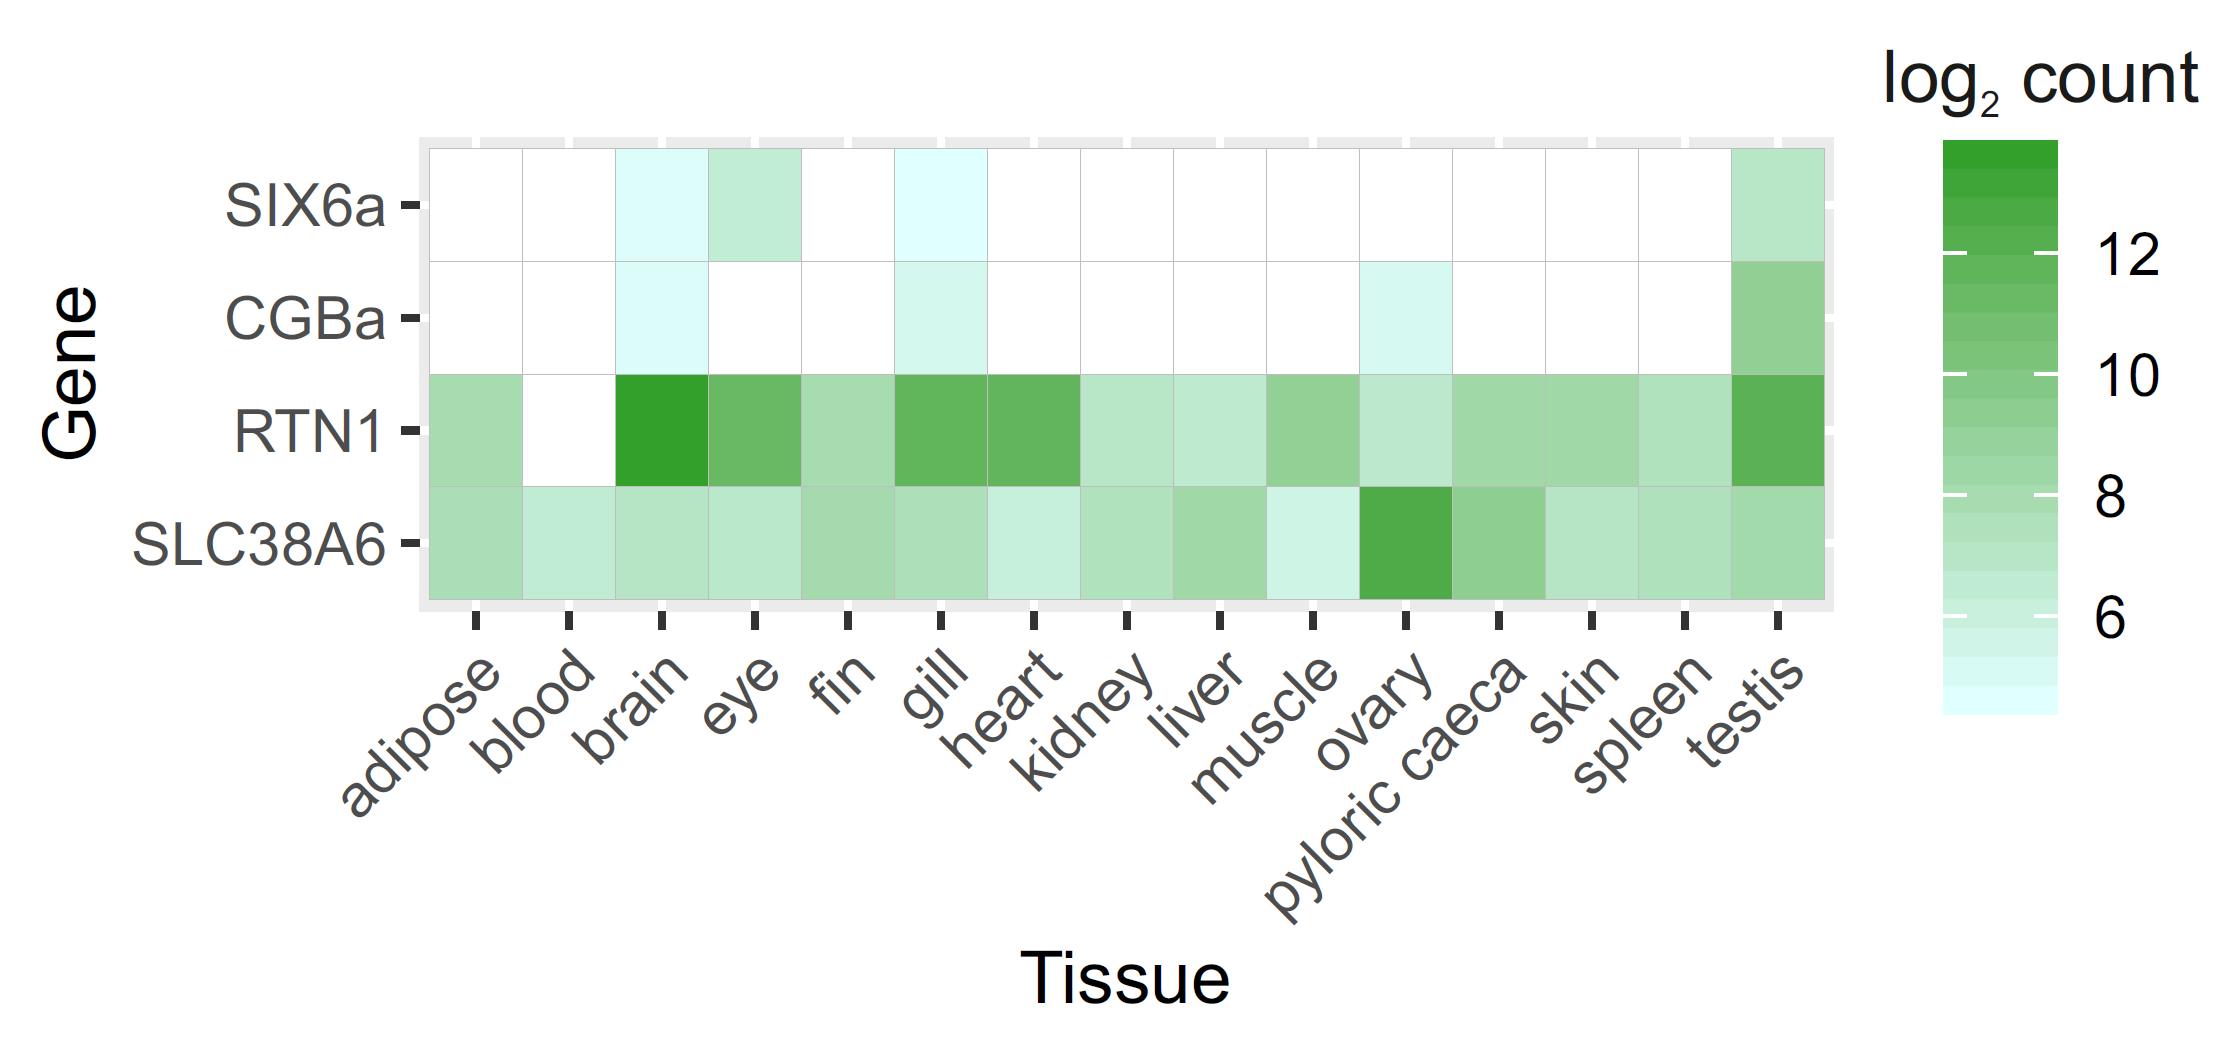


**Figure S1.** mRNA expression profiles of *six6a*-related genes in fifteen Atlantic salmon tissues. *Six6a*, *cgba*, *rtn1* and *slc38a6* expressed in 14 tissues of three-year old parr and blood of fry. The values were log2-transformed and log2(20) = 4.3 count was defined as a detection threshold below which values are shown in white. The data are represented as mean.
